# Supplementary material for: Determination of paramagnetic concentrations inside a diamagnetic matrix using solid-state NMR
Source: Royal Society of Chemistry journal article supplement (doi:10.1039/c7cp00451f), 2017-01-01
Supplement: c7cp00451f1.pdf [file c7cp00451f1.pdf]

# **Determination of a paramagnetic concentration inside a diamagnetic matrix by Solid-State NMR**

Supplementary Information

Sébastien Maron<sup>&,\*</sup>, Nadège Ollier<sup>‡</sup>, Thierry Gacoin<sup>&</sup>, Géraldine Dantelle<sup>†</sup>

<sup>&</sup>Laboratoire de Physique de la Matière Condensée, École polytechnique,  
CNRS, Université Paris Saclay, 91128 Palaiseau Cedex, France

<sup>‡</sup>Laboratoire des Solides Irradiés, École polytechnique, CNRS, CEA, 91128 Palaiseau Cedex, France

<sup>†</sup>Institut Néel CNRS, UPR 2940/Université Grenoble Alpes  
25 Av. des Martyrs – 38 042 Grenoble Cedex 09, France

\*sebastien.maron@polytechnique.edu

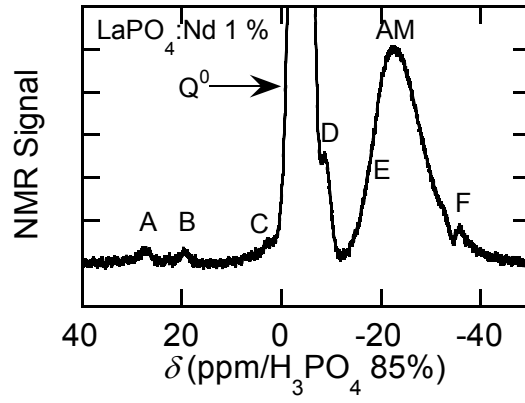

Figure SI-1:  $^{31}\text{P}$  SSNMR of  $\text{La}_{0.99}\text{Nd}_{0.01}\text{PO}_4$  with a very short repetition time (50 ms) for exalting paramagnetic peaks noted A to F.  $Q^0$  is the peak corresponding to phosphorous without Nd in the first coordination shell and AM an amorphous phase. Figure previously published in 2014 by Maron et al.<sup>1</sup>

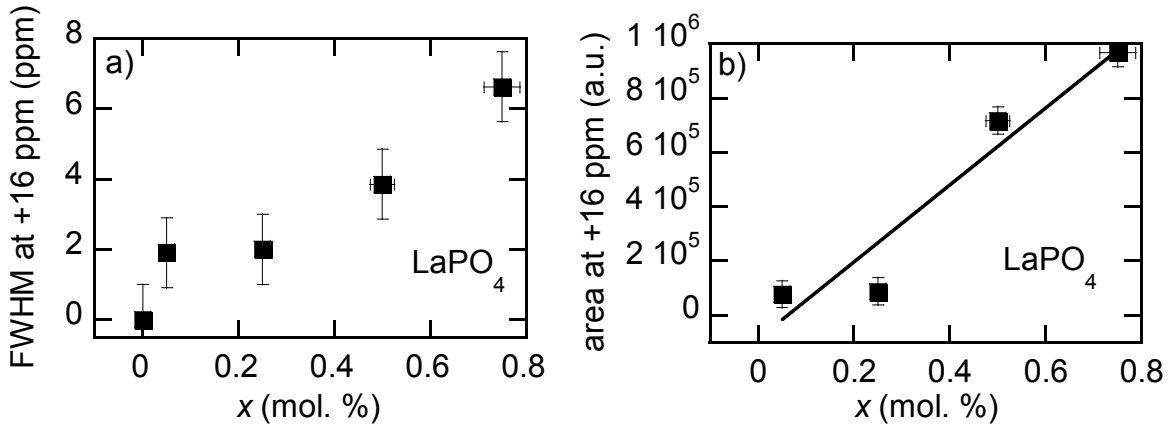

Figure SI-2: evolution of FWHM (a) and the area (b) of a paramagnetic peak of  $\text{La}_{1-x}\text{Nd}_x\text{PO}_4$  (peak B at +16 ppm).

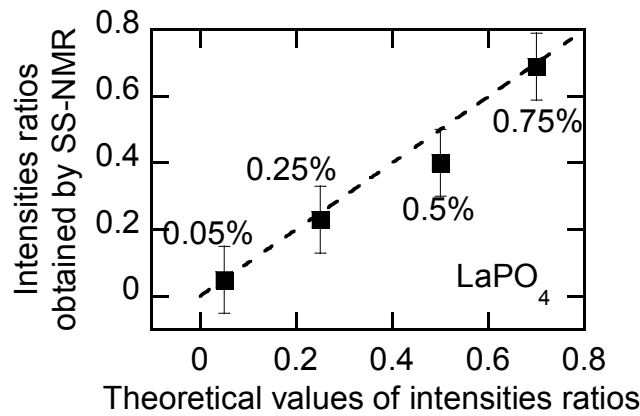

Figure SI-3: ratios between the intensities of one paramagnetic peak and the unshifted peak in function of the theoretical values of these ratios for  $\text{LaPO}_4$  (paramagnetic peak at +16 ppm).<sup>2</sup> The dotted line corresponds to  $y = x$ , indicating that the real Nd concentration matches the nominal one; numbers indicated the nominal concentrations.

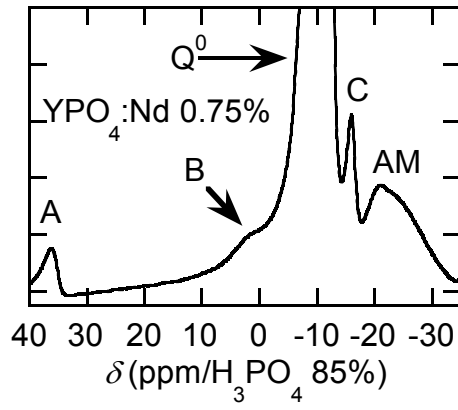

Figure SI-4: NMR spectra of  $\text{YPO}_4:\text{Nd}$  0.75 %. The attribution is made according to Palke and Stebbins.<sup>3</sup> This spectrum is obtained with a short repetition time (50 ms). A to C are paramagnetic peaks, corresponding to  $^{31}\text{P}$  with  $\text{Nd}^{3+}$  in their first shell coordination;  $\text{Q}^0$  is the unshifted peak corresponding to  $^{31}\text{P}$  without  $\text{Nd}^{3+}$  and AM is an amorphous phase due to an excess of P. Both signals are enhanced by the chosen conditions, i.e. a short relaxation time.

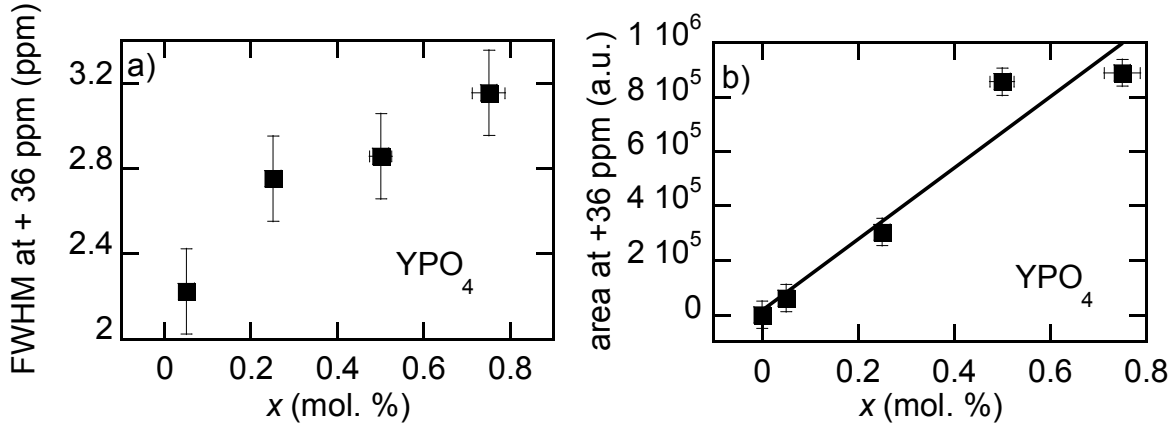

Figure SI-5: evolution of FWHM (a) and the area (b) of a paramagnetic peak of  $\text{Y}_{1-x}\text{Nd}_x\text{PO}_4$  (peak A at +36 ppm).

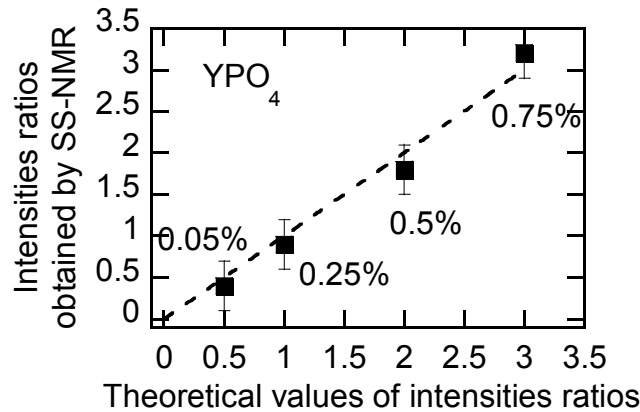

Figure SI-6: ratios between the intensities of one paramagnetic peak and the unshifted peak in function of the theoretical values of these ratios for  $\text{YPO}_4$  (paramagnetic peak at +36 ppm).<sup>2</sup> The dotted line corresponds to  $y = x$ , indicating that the real Nd concentration matches the nominal one; numbers indicated the nominal concentrations.

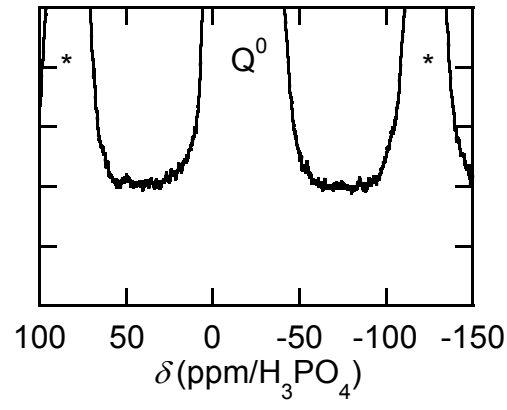

Figure SI-7: SSNMR spectra of  $499\text{P}_2\text{O}_5:167\text{MgO}:333\text{Na}_2\text{O}:1\text{Nd}_2\text{O}_3$  glasses with a short repetition time (50 ms) to try to enhance paramagnetic peaks.  $Q^0$  corresponds to the  $^{31}\text{P}$  with no  $\text{Nd}^{3+}$  in its vicinity and stars design spinning bands ( $\omega_{\text{rot}} = 15$  kHz).

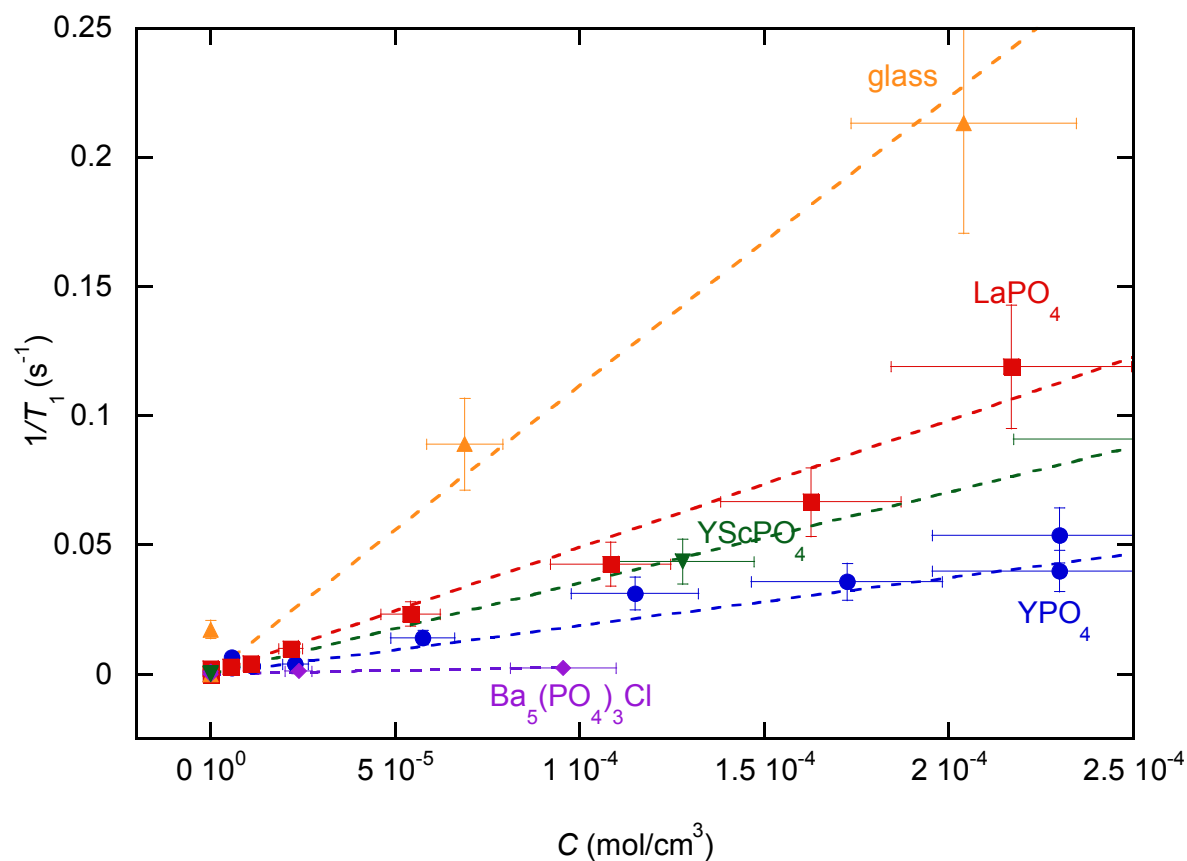

Figure SI-8: variation of  $1/T_1$  in function of the concentration  $C$  (expressed in  $\text{mol}/\text{cm}^3$ ) for very low level doping.

1. S. Maron, G. Dantelle, T. Gacoin and F. Devreux, *Physical Chemistry Chemical Physics*, 2014, **16**, 18788-18798.
2. A. C. Palke, J. F. Stebbins and L. A. Boatner, *Inorganic Chemistry*, 2013, **52**, 12605-12615.
3. A. C. Palke and J. F. Stebbins, *American Mineralogist*, 2011, **96**, 1343-1353.
